# Supplementary material for: The Combined Effects of Dietary Diversity and Frailty on Mortality in Older Taiwanese People
Source: MDPI journal article supplement (doi:10.3390/nu14183825), 2022-09-16
Supplement: s1 [file s1]

**Table S1.** The definition of a serving for six food groups.

| Food groups             | Definition of one serving |
|-------------------------|---------------------------|
| Grain                   | 15 g of carbohydrate      |
| Soybeans/fish/eggs/meat | 7 g of protein            |
| Dairy                   | 8 g of protein            |
| Oil/fat/nuts            | 5 g of fat                |
| Vegetables              | 25 kcal                   |
| Fruit                   | 60 kcal                   |

**Table S2.** Baseline characteristics by frailty severity among NAHSIT 2005–2008 older adults (*n* = 968).

|                                       | Frailty severity |             |             | P-value |
|---------------------------------------|------------------|-------------|-------------|---------|
|                                       | Robust           | Prefrailty  | Frailty     |         |
| <i>n</i> , %                          | 582 (60.3)       | 349 (35.8)  | 37 (3.9)    |         |
| Weight sample size (n)                | 1,372,246        | 815,767     | 88,343      |         |
| Gender, %                             |                  |             |             | 0.004   |
| Men                                   | 53.9             | 42.3        | 46.9        |         |
| Women                                 | 46.1             | 57.7        | 53.2        |         |
| Age (years), %                        | 72.8 ± 0.34      | 74.5 ± 0.40 | 75.2 ± 1.10 | 0.003   |
| 65–69                                 | 36.2             | 26.6        | 23.4        | 0.006   |
| 70–74                                 | 25.9             | 26.1        | 18.1        |         |
| 75–79                                 | 24.4             | 27.0        | 33.0        |         |
| ≥ 80                                  | 13.6             | 20.3        | 25.5        |         |
| Education, %                          |                  |             |             | 0.074   |
| Illiterate                            | 24.4             | 29.7        | 38.7        |         |
| Some up to primary school             | 57.1             | 50.7        | 54.0        |         |
| High school and above                 | 18.6             | 19.6        | 7.30        |         |
| Smoking, %                            | 35.3             | 31.4        | 41.9        | 0.376   |
| Drink alcohol, %                      | 33.7             | 27.7        | 42.9        | 0.171   |
| Enough money, %                       |                  |             |             | 0.668   |
| More than enough                      | 6.15             | 7.95        | 5.98        |         |
| Just enough                           | 63.3             | 57.7        | 48.0        |         |
| difficult                             | 30.6             | 34.4        | 46.0        |         |
| Perceived health status, %            |                  |             |             | <0.001  |
| Good                                  | 34.3             | 22.3        | 6.53        |         |
| Fair                                  | 54.3             | 44.9        | 21.5        |         |
| Poor                                  | 11.4             | 32.9        | 72.0        |         |
| Poor sleep quality, %                 | 6.74             | 13.0        | 20.4        | <0.001  |
| Number of diseases                    | 1.85 ± 0.06      | 3.55 ± 0.15 | 5.69 ± 0.37 | <0.001  |
| Number of drug treatments             | 0.92 ± 0.05      | 1.91 ± 0.10 | 3.71 ± 0.26 | <0.001  |
| Cognitive impairment <sup>‡</sup> , % | 13.3             | 19.0        | 20.6        | 0.125   |
| Supplement use, %                     | 42.8             | 58.8        | 48.2        | 0.003   |
| BMI (kg/m <sup>2</sup> )              | 24.5 ± 0.19      | 24.8 ± 0.40 | 25.0 ± 1.22 | 0.412   |
| Waist circumference (cm)              | 86.0 ± 0.51      | 87.4 ± 0.97 | 86.7 ± 3.03 | 0.429   |
| Hip circumference (cm)                | 93.2 ± 0.53      | 94.0 ± 0.88 | 93.1 ± 2.64 | 0.357   |

Data were weighted for unequal probability of sampling design by SUDAAN software.

Categorical variables are presented as percent, and continuous variables are presented as mean ± SEM.

One-way analysis of variance (ANOVA) and chi-square test were used for continuous and categorical variables.

Cognitive impairment<sup>¶</sup> was defined by an SPMSQ with  $\geq 3$  errors.

**Table S3.** Baseline characteristics by frailty severity among NAHSIT 2005–2008 older men (*n* = 482).

|                                       | Frailty severity |             |             | P-value |
|---------------------------------------|------------------|-------------|-------------|---------|
|                                       | Robust           | Prefrailty  | Frailty     |         |
| <i>n</i> , %                          | 316              | 149         | 17          |         |
| Weight sample size (n)                | 739,492          | 344,817     | 41,386      |         |
| Age (years), %                        | 73.0 ± 0.35      | 74.7 ± 0.59 | 75.6 ± 1.72 | 0.008   |
| 65–69                                 | 32.3             | 27.3        | 24.2        | 0.163   |
| 70–74                                 | 26.5             | 21.7        | 21.5        |         |
| 75–79                                 | 28.6             | 30.4        | 17.1        |         |
| ≥80                                   | 12.1             | 20.6        | 37.2        |         |
| Education, %                          |                  |             |             | 0.012   |
| Illiterate                            | 7.93             | 10.7        | 21.0        |         |
| Up to primary school                  | 61.8             | 50.2        | 76.6        |         |
| High school and above                 | 30.3             | 39.1        | 2.36        |         |
| Smoking, %                            | 61.9             | 67.9        | 81.0        | 0.178   |
| Drink alcohol, %                      | 52.0             | 54.9        | 55.4        | 0.850   |
| Enough money, %                       |                  |             |             | 0.641   |
| More than enough                      | 7.72             | 11.0        | 4.65        |         |
| Just enough                           | 63.2             | 57.4        | 57.5        |         |
| difficult                             | 29.1             | 31.6        | 37.9        |         |
| Perceived health status, %            |                  |             |             | 0.003   |
| Good                                  | 40.0             | 29.1        | 13.8        |         |
| Fair                                  | 50.3             | 41.6        | 8.77        |         |
| Poor                                  | 9.70             | 29.4        | 77.4        |         |
| Poor sleep quality, %                 | 3.65             | 14.9        | 8.52        | <0.001  |
| Number of diseases                    | 1.92 ± 0.07      | 4.12 ± 0.21 | 5.66 ± 0.66 | <0.001  |
| Number of drug treatments             | 0.93 ± 0.06      | 2.02 ± 0.15 | 3.50 ± 0.41 | <0.001  |
| Cognitive impairment <sup>‡</sup> , % | 4.28             | 10.6        | 17.9        | 0.117   |
| Supplement use, %                     | 38.9             | 61.9        | 25.1        | <0.001  |
| BMI (kg/m <sup>2</sup> )              | 24.2 ± 0.26      | 23.7 ± 0.59 | 22.6 ± 1.19 | 0.195   |
| Waist circumference (cm)              | 87.2 ± 0.68      | 86.7 ± 1.62 | 86.2 ± 2.31 | 0.797   |
| Hip circumference (cm)                | 92.5 ± 0.63      | 92.7 ± 1.26 | 90.8 ± 2.18 | 0.782   |

Data were weighted for unequal probability of sampling design by SUDAAN software.

Categorical variables are presented as percent, and continuous variables are presented as the mean ± standard error of the mean (SEM).

One-way ANOVA and chi-square test were used for continuous and categorical variables.

<sup>‡</sup>Cognitive impairment was defined by an SPMSQ with ≥3 errors.

**Table S4.** Baseline characteristics by frailty severity among NAHSIT 2005–2008 older women (*n* = 486).

|                                       | Frailty severity |             |             | P-value |
|---------------------------------------|------------------|-------------|-------------|---------|
|                                       | Robust           | Prefrailty  | Frailty     |         |
| <i>n</i> , %                          | 266              | 200         | 20          |         |
| Weight sample size (n)                | 632,754          | 470,950     | 46,957      |         |
| Age (years), %                        | 72.6 ± 0.57      | 74.3 ± 0.56 | 74.8 ± 1.29 | 0.075   |
| 65–69                                 | 40.0             | 26.0        | 22.6        | 0.001   |
| 70–74                                 | 25.2             | 29.3        | 15.0        |         |
| 75–79                                 | 19.5             | 24.6        | 47.1        |         |
| ≥80                                   | 15.3             | 20.2        | 15.3        |         |
| Education, %                          |                  |             |             | 0.618   |
| Illiterate                            | 43.6             | 43.7        | 54.4        |         |
| Up to primary school                  | 51.5             | 51.1        | 34.0        |         |
| High school and above                 | 4.97             | 5.28        | 11.7        |         |
| Smoking, %                            | 2.54             | 5.10        | 7.45        | 0.305   |
| Drink alcohol, %                      | 11.3             | 7.93        | 31.9        | 0.091   |
| Enough money, %                       |                  |             |             | 0.534   |
| More than enough                      | 4.23             | 5.66        | 7.16        |         |
| Just enough                           | 63.3             | 58.0        | 39.6        |         |
| difficult                             | 32.5             | 36.4        | 53.2        |         |
| Perceived health status, %            |                  |             |             | <0.001  |
| Good                                  | 27.5             | 17.2        | 0.00        |         |
| Fair                                  | 59.0             | 42.4        | 32.8        |         |
| Poor                                  | 13.5             | 35.4        | 67.2        |         |
| Poor sleep quality, %                 | 10.5             | 11.7        | 30.6        | 0.149   |
| Number of diseases                    | 1.77 ± 0.11      | 3.13 ± 0.16 | 5.71 ± 0.34 | <0.001  |
| Number of drug treatments             | 0.90 ± 0.07      | 1.83 ± 0.11 | 3.90 ± 0.37 | <0.001  |
| Cognitive impairment <sup>‡</sup> , % | 24.6             | 25.2        | 23.0        | 0.235   |
| Supplement use, %                     | 47.3             | 56.5        | 68.6        | 0.138   |
| BMI (kg/m <sup>2</sup> )              | 24.8 ± 0.23      | 25.7 ± 0.43 | 26.6 ± 1.64 | 0.045   |
| Waist circumference (cm)              | 84.6 ± 0.80      | 87.2 ± 1.02 | 87.0 ± 5.00 | 0.013   |
| Hip circumference (cm)                | 94.0 ± 0.60      | 95.1 ± 0.76 | 94.8 ± 4.42 | 0.323   |

Data were weighted for unequal probability of sampling design by SUDAAN software.

Categorical variables are presented as percent, and continuous variables are presented as the mean ± SEM.

One-way analysis of variance and chi-square test were used for continuous and categorical variables.

<sup>‡</sup>Cognitive impairment was defined by an SPMSQ with ≥3 errors.

**Table S5.** Distributions of food intake frequency by DDS among NAHSIT 2005–2008 older adults ( $n = 329$ ).

|                                     | DDS             |                 |                 | P for trend |
|-------------------------------------|-----------------|-----------------|-----------------|-------------|
|                                     | $\leq 4$        | 5               | 6               |             |
| $n, \%$                             | 124 (37.7)      | 138 (42.0)      | 67 (20.4)       |             |
| Food intake frequency, times/weekly |                 |                 |                 |             |
| Egg                                 | $2.09 \pm 2.15$ | $2.31 \pm 2.17$ | $3.31 \pm 3.07$ | 0.001       |
| Milk and milk powder                | $1.74 \pm 3.40$ | $2.77 \pm 3.89$ | $6.22 \pm 3.39$ | <0.001      |
| Processed dairy products            | $0.30 \pm 1.18$ | $0.56 \pm 1.48$ | $1.28 \pm 2.31$ | <0.001      |
| Rice                                | $15.5 \pm 6.01$ | $14.9 \pm 5.15$ | $13.7 \pm 4.71$ | 0.039       |
| Noodles products                    | $3.36 \pm 3.42$ | $4.00 \pm 4.26$ | $3.65 \pm 3.24$ | 0.450       |
| Roots and tubers                    | $1.41 \pm 3.23$ | $1.38 \pm 2.58$ | $2.43 \pm 4.48$ | 0.075       |
| Breakfast cereals                   | $1.32 \pm 2.42$ | $1.83 \pm 3.91$ | $3.67 \pm 3.34$ | <0.001      |
| Beans                               | $0.55 \pm 2.20$ | $0.40 \pm 1.02$ | $0.40 \pm 0.96$ | 0.473       |
| Vegetables                          | $22.8 \pm 14.3$ | $24.9 \pm 13.9$ | $29.0 \pm 21.0$ | 0.013       |
| Mushrooms                           | $0.70 \pm 1.17$ | $0.99 \pm 1.32$ | $1.55 \pm 1.94$ | <0.001      |
| Pickled vegetables                  | $1.08 \pm 2.44$ | $0.95 \pm 2.85$ | $0.59 \pm 1.38$ | 0.210       |
| Fresh fruit                         | $4.81 \pm 5.08$ | $8.54 \pm 6.64$ | $10.6 \pm 6.18$ | <0.001      |
| Processed fruit products            | $0.50 \pm 1.63$ | $0.58 \pm 1.57$ | $0.89 \pm 2.38$ | 0.164       |
| Nuts and seeds                      | $1.00 \pm 2.57$ | $1.28 \pm 2.29$ | $1.36 \pm 2.59$ | 0.291       |
| Soybean products                    | $3.31 \pm 4.67$ | $2.67 \pm 2.83$ | $3.49 \pm 4.30$ | 0.988       |
| Seafood fish and shellfish          | $6.67 \pm 6.08$ | $6.90 \pm 6.02$ | $9.03 \pm 7.51$ | 0.030       |
| Poultry                             | $0.94 \pm 1.28$ | $1.39 \pm 1.89$ | $1.32 \pm 1.67$ | 0.064       |
| Livestock                           | $3.50 \pm 4.74$ | $4.11 \pm 3.56$ | $3.55 \pm 3.83$ | 0.740       |
| Organ meats                         | $0.12 \pm 0.29$ | $0.18 \pm 0.68$ | $0.29 \pm 0.95$ | 0.077       |
| Blood and other parts               | $0.12 \pm 0.31$ | $0.24 \pm 0.53$ | $0.16 \pm 0.31$ | 0.281       |
| Processed meat                      | $0.91 \pm 1.41$ | $0.96 \pm 1.06$ | $1.08 \pm 1.62$ | 0.410       |
| Sweetened beverages                 | $0.33 \pm 1.31$ | $0.53 \pm 2.48$ | $0.27 \pm 0.95$ | 0.997       |
| Tea                                 | $4.32 \pm 8.34$ | $3.30 \pm 5.53$ | $5.98 \pm 9.80$ | 0.304       |
| Coffee                              | $0.27 \pm 1.08$ | $0.79 \pm 2.00$ | $1.02 \pm 2.70$ | 0.006       |
| Chocolate products                  | $0.87 \pm 2.45$ | $0.91 \pm 2.49$ | $1.14 \pm 4.64$ | 0.580       |
| Snacks                              | $1.91 \pm 2.6$  | $2.66 \pm 3.02$ | $3.63 \pm 4.40$ | <0.001      |

All variables are presented as the mean  $\pm$  SD, and based on the general linear model regression.
